# Supplementary material for: Feasibility, Usability, and Safety of ParaGym, an Intelligent Mobile Exercise App for Individuals With Paraplegia: Protocol for a Pilot Block-Randomized Controlled Trial
Source: PubMed Central journal article supplement (PMC10238958; doi:10.2196/45652), 2023-05-19
Supplement: resprot_v12i1e45652_app2.pdf [file resprot_v12i1e45652_app2.pdf]

| Mein Aktivitätsprotokoll |                                                               |                                     |                | Probanden-ID |
|--------------------------|---------------------------------------------------------------|-------------------------------------|----------------|--------------|
| Datum                    | Meine Aktivität<br>(z.B. Therapie, Handbike, ParaGym<br>etc.) | Intensität<br>mit der<br>Borg-Skala | Dauer<br>(min) | Notizen      |
|                          |                                                               |                                     |                |              |
|                          |                                                               |                                     |                |              |
|                          |                                                               |                                     |                |              |
|                          |                                                               |                                     |                |              |
|                          |                                                               |                                     |                |              |
